# Supplementary material for: Community health workers for pandemic response: a rapid evidence synthesis
Source: PubMed Central journal article supplement (PMC7292038; doi:10.1136/bmjgh-2020-002769), 2020-06-10
Supplement: bmjgh-2020-002769supp001.pdf [file bmjgh-2020-002769supp001.pdf]

# Appendices for Community health workers for pandemic response: a rapid evidence synthesis

Bhaumik S, Moola S, Tyagi J, Nambiar D, Kakoti M

## Contents

|                                                                                                                                                      |    |
|------------------------------------------------------------------------------------------------------------------------------------------------------|----|
| Appendix 1 : PRISMA-ScR Checklist .....                                                                                                              | 2  |
| Appendix 2– Search Strategy for PubMed .....                                                                                                         | 4  |
| Appendix 3– List of organisations, and other unpublished resource databases that were hand searched.....                                             | 5  |
| Appendix 4 – Table of studies excluded at full text phase .....                                                                                      | 6  |
| Appendix 5 – Inventory of relevant guidelines on COVID-19/pandemic control and response for health workers .....                                     | 7  |
| Appendix 6 – Inventory of self-isolation guidelines in relation to COVID-19 control.....                                                             | 11 |
| Appendix 7 – Inventory of IEC materials in relation to COVID-19 control and response produced by different organisations/authorities worldwide ..... | 12 |

## Appendix 1 : PRISMA-ScR Checklist

| SECTION                           | ITEM | PRISMA-ScR CHECKLIST ITEM                                                                                                                                                                                                                                                                                  | REPORTED    |
|-----------------------------------|------|------------------------------------------------------------------------------------------------------------------------------------------------------------------------------------------------------------------------------------------------------------------------------------------------------------|-------------|
| <b>TITLE</b>                      |      |                                                                                                                                                                                                                                                                                                            |             |
| Title                             | 1    | Identify the report as a scoping review.                                                                                                                                                                                                                                                                   | Yes, as RES |
| <b>ABSTRACT</b>                   |      |                                                                                                                                                                                                                                                                                                            |             |
| Structured summary                | 2    | Provide a structured summary that includes (as applicable): background, objectives, eligibility criteria, sources of evidence, charting methods, results, and conclusions that relate to the review questions and objectives.                                                                              | Yes         |
| <b>INTRODUCTION</b>               |      |                                                                                                                                                                                                                                                                                                            |             |
| Rationale                         | 3    | Describe the rationale for the review in the context of what is already known. Explain why the review questions/objectives lend themselves to a scoping review approach.                                                                                                                                   | Yes         |
| Objectives                        | 4    | Provide an explicit statement of the questions and objectives being addressed with reference to their key elements (e.g., population or participants, concepts, and context) or other relevant key elements used to conceptualize the review questions and/or objectives.                                  | Yes         |
| <b>METHODS</b>                    |      |                                                                                                                                                                                                                                                                                                            |             |
| Protocol and registration         | 5    | Indicate whether a review protocol exists; state if and where it can be accessed (e.g., a Web address); and if available, provide registration information, including the registration number.                                                                                                             | Yes         |
| Eligibility criteria              | 6    | Specify characteristics of the sources of evidence used as eligibility criteria (e.g., years considered, language, and publication status), and provide a rationale.                                                                                                                                       | Yes         |
| Information sources*              | 7    | Describe all information sources in the search (e.g., databases with dates of coverage and contact with authors to identify additional sources), as well as the date the most recent search was executed.                                                                                                  | Yes         |
| Search                            | 8    | Present the full electronic search strategy for at least 1 database, including any limits used, such that it could be repeated.                                                                                                                                                                            | Yes         |
| Selection of sources of evidence† | 9    | State the process for selecting sources of evidence (i.e., screening and eligibility) included in the scoping review.                                                                                                                                                                                      | Yes         |
| Data charting process‡            | 10   | Describe the methods of charting data from the included sources of evidence (e.g., calibrated forms or forms that have been tested by the team before their use, and whether data charting was done independently or in duplicate) and any processes for obtaining and confirming data from investigators. | Yes         |
| Data items                        | 11   | List and define all variables for which data were sought and any assumptions and simplifications made.                                                                                                                                                                                                     | Yes         |

| SECTION                                               | ITEM | PRISMA-ScR CHECKLIST ITEM                                                                                                                                                                             | REPORTED |
|-------------------------------------------------------|------|-------------------------------------------------------------------------------------------------------------------------------------------------------------------------------------------------------|----------|
| Critical appraisal of individual sources of evidence§ | 12   | If done, provide a rationale for conducting a critical appraisal of included sources of evidence; describe the methods used and how this information was used in any data synthesis (if appropriate). | Yes      |
| Synthesis of results                                  | 13   | Describe the methods of handling and summarizing the data that were charted.                                                                                                                          | Yes      |
| <b>RESULTS</b>                                        |      |                                                                                                                                                                                                       |          |
| Selection of sources of evidence                      | 14   | Give numbers of sources of evidence screened, assessed for eligibility, and included in the review, with reasons for exclusions at each stage, ideally using a flow diagram.                          | Yes      |
| Characteristics of sources of evidence                | 15   | For each source of evidence, present characteristics for which data were charted and provide the citations.                                                                                           | Yes      |
| Critical appraisal within sources of evidence         | 16   | If done, present data on critical appraisal of included sources of evidence (see item 12).                                                                                                            | Yes      |
| Results of individual sources of evidence             | 17   | For each included source of evidence, present the relevant data that were charted that relate to the review questions and objectives.                                                                 | Yes      |
| Synthesis of results                                  | 18   | Summarize and/or present the charting results as they relate to the review questions and objectives.                                                                                                  | Yes      |
| <b>DISCUSSION</b>                                     |      |                                                                                                                                                                                                       |          |
| Summary of evidence                                   | 19   | Summarize the main results (including an overview of concepts, themes, and types of evidence available), link to the review questions and objectives, and consider the relevance to key groups.       | Yes      |
| Limitations                                           | 20   | Discuss the limitations of the scoping review process.                                                                                                                                                | Yes      |
| Conclusions                                           | 21   | Provide a general interpretation of the results with respect to the review questions and objectives, as well as potential implications and/or next steps.                                             | Yes      |
| <b>FUNDING</b>                                        |      |                                                                                                                                                                                                       |          |
| Funding                                               | 22   | Describe sources of funding for the included sources of evidence, as well as sources of funding for the scoping review. Describe the role of the funders of the scoping review.                       | Yes      |

From: Tricco AC, Lillie E, Zarin W, O'Brien KK, Colquhoun H, Levac D, et al. PRISMA Extension for Scoping Reviews (PRISMA-ScR): Checklist and Explanation. *Ann Intern Med.* 2018;169:467–473.

## Appendix 2– Search Strategy for PubMed

| No. | Search terms                                                                                                                                                                                                                                                                                                                                                                                                                                                                                                                                                                                                                                                                                                                                                                                                                                                                                                                                                                                                                                                                                                                                                                       | No. of hits |
|-----|------------------------------------------------------------------------------------------------------------------------------------------------------------------------------------------------------------------------------------------------------------------------------------------------------------------------------------------------------------------------------------------------------------------------------------------------------------------------------------------------------------------------------------------------------------------------------------------------------------------------------------------------------------------------------------------------------------------------------------------------------------------------------------------------------------------------------------------------------------------------------------------------------------------------------------------------------------------------------------------------------------------------------------------------------------------------------------------------------------------------------------------------------------------------------------|-------------|
| #1  | "community health worker*" [tw] OR "lay health worker" [tw] OR "lay health workers" [tw] OR "frontline health workers" [tw] OR "close-to-community providers" [tw] OR "frontline health providers" [tw] OR "CHW" [tw] OR "CHWs" [tw] OR "LHW" [tw] OR "LHWs" [tw] OR "lady health workers" [tw] OR "rural health worker*" [tw] OR "accredited social health activist" [tw] OR "ASHA worker" [tw] OR "ASHA workers" [tw] OR "community surveillance volunteer*" [tw] OR "female multipurpose health worker*" [tw] OR "community case management worker*" [tw] OR "health extension worker*" [tw] OR "outreach worker" [tw] OR "health extension worker*" [tw] OR "community health agent*" [tw] OR "community health aide" [tw] OR "community health aides" [tw] OR "village health worker" [tw] OR "village health workers" [tw] OR "health auxiliary" [tw] OR "health auxiliaries" [tw] OR "barefoot doctor" [tw] OR "community health practitioner" [tw] OR "community health practitioners" [tw] OR "lay health advisor" [tw] OR "lay health advisors" [tw] OR "lay health promoter" [tw] OR "lay health promoters" [tw] OR "community worker" [tw] OR "community workers" [tw] | 4551        |
| #2  | ((("2019-nCoV" OR "2019nCoV" OR "COVID-19" OR "SARS-CoV-2" OR "SARS-2" OR (wuhan AND coronavirus))) OR (("COVID-19"[Supplementary Concept] OR "severe acute respiratory syndrome coronavirus 2"[Supplementary Concept])) OR "Wuhan seafood market pneumonia virus"                                                                                                                                                                                                                                                                                                                                                                                                                                                                                                                                                                                                                                                                                                                                                                                                                                                                                                                 | 1429        |
| #3  | Hemorrhagic Fever, Ebola[MH] OR Ebola[tw] OR SARS[tw] OR coronavirus[tw] OR "severe acute respiratory syndrome" [tw] OR "SARS Virus"[MH] OR "SARS Virus"[tw] OR "SARS-CoV" [tw] OR "SARS-Associated Coronavirus" [tw] OR "sudden acute respiratory syndrome" [tw] OR "swine flu" [tw] OR "swine influenza" [tw] OR "HIN1" [tw] OR "Middle East respiratory syndrome coronavirus" [tw] OR "MERS-CoV" [tw] OR pandemic[tw] OR pandemics[tw] OR "disease outbreak" [tw] OR "disease outbreaks" [tw] OR outbreak[tw] OR "outbreaks" [tw] OR epidemic[tw] OR epidemics[tw]                                                                                                                                                                                                                                                                                                                                                                                                                                                                                                                                                                                                              | 240235      |
| #4  | #2 OR #3                                                                                                                                                                                                                                                                                                                                                                                                                                                                                                                                                                                                                                                                                                                                                                                                                                                                                                                                                                                                                                                                                                                                                                           | 240473      |
| #5  | #1 AND #4                                                                                                                                                                                                                                                                                                                                                                                                                                                                                                                                                                                                                                                                                                                                                                                                                                                                                                                                                                                                                                                                                                                                                                          | <b>211</b>  |

### Appendix 3– List of organisations, and other unpublished resource databases that were hand searched

| Organisation and Weblink                                                                                                                                                                                                                                                                        |
|-------------------------------------------------------------------------------------------------------------------------------------------------------------------------------------------------------------------------------------------------------------------------------------------------|
| 1. European CDC: <a href="http://www.ecdc.europa.eu">www.ecdc.europa.eu</a>                                                                                                                                                                                                                     |
| 2. Africa CDC <a href="http://www.africacdc.org">www.africacdc.org</a>                                                                                                                                                                                                                          |
| 3. China CDC <a href="http://www.chinacdc.cn">www.chinacdc.cn</a>                                                                                                                                                                                                                               |
| 4. World health Organization <a href="http://www.who.int">www.who.int</a>                                                                                                                                                                                                                       |
| 5. CDC Atlanta <a href="http://www.cdc.gov">www.cdc.gov</a>                                                                                                                                                                                                                                     |
| 6. Ministry of health and family welfare <a href="http://www.mohfw.gov.in">www.mohfw.gov.in</a>                                                                                                                                                                                                 |
| 7. Ministry of health Singapore <a href="http://www.moh.gov.sg">www.moh.gov.sg</a>                                                                                                                                                                                                              |
| 8. National Institute of Communicable Disease <a href="http://www.nicd.ac.za">www.nicd.ac.za</a>                                                                                                                                                                                                |
| 9. Australian Government Department of Health <a href="http://www.health.gov.au">www.health.gov.au</a>                                                                                                                                                                                          |
| 10. U.S. Department of Labor Occupational Safety and Health Administration <a href="http://www.osha.gov">www.osha.gov</a>                                                                                                                                                                       |
| 11. Public health England <a href="http://www.gov.uk">www.gov.uk</a>                                                                                                                                                                                                                            |
| 12. Centre for health protection. Department of health the Government of the Hong Kong special administration region<br><a href="https://www.chp.gov.hk/files/pdf/ic_advice_for_nid_in_healthcare_setting.pdf">https://www.chp.gov.hk/files/pdf/ic_advice_for_nid_in_healthcare_setting.pdf</a> |
| 13. New England Journal of Medicine <a href="https://www.nejm.org/coronavirus">https://www.nejm.org/coronavirus</a>                                                                                                                                                                             |
| 14. Wiley Online Library <a href="https://novel-coronavirus.onlinelibrary.wiley.com/">https://novel-coronavirus.onlinelibrary.wiley.com/</a>                                                                                                                                                    |
| 15. Elsevier <a href="https://www.elsevier.com/connect/coronavirus-information-center">https://www.elsevier.com/connect/coronavirus-information-center</a>                                                                                                                                      |
| 16. medRxiv and bioRxiv <a href="http://connect.medrxiv.org/relate/content/181">http://connect.medrxiv.org/relate/content/181</a>                                                                                                                                                               |
| 17. Oxford Academic <a href="https://academic.oup.com/journals/pages/coronavirus">https://academic.oup.com/journals/pages/coronavirus</a>                                                                                                                                                       |
| 18. JAMA Network <a href="https://jamanetwork.com/journals/jama/pages/coronavirus-alert">https://jamanetwork.com/journals/jama/pages/coronavirus-alert</a>                                                                                                                                      |

## Appendix 4 – Table of studies excluded at full text phase

| No. | Name of Study                                                                                                                                                                              | Reason for exclusion     |
|-----|--------------------------------------------------------------------------------------------------------------------------------------------------------------------------------------------|--------------------------|
| 1.  | Acceptability of pandemic A(H1N1) influenza vaccination by Essential Community Workers in 2010 Alicante (Spain), perceived seriousness and sources of information                          | Wrong population         |
| 2.  | The Impact of the SARS Epidemic on the Utilization of Medical Services: SARS and the Fear of SARS                                                                                          | Wrong population         |
| 3.  | West African countries focus on post-Ebola recovery plans                                                                                                                                  | Wrong Population         |
| 4.  | Integrated disease surveillance and response strategy for epidemic prone diseases at the primary health care (PHC) level in Oyo State, Nigeria: what do health care workers know and feel? | It does not include CHWs |
| 5.  | Health inequalities and infectious disease epidemics: a challenge for global health security                                                                                               | It does not include CHWs |
| 6.  | Lives on the line? Ethics and practicalities of duty of care in pandemics and disasters                                                                                                    | It does not include CHWs |
| 7.  | Reduced vaccination and the risk of measles and other childhood infections post-Ebola                                                                                                      | It does not include CHWs |

## References:

1. Caballero, P., Tuells, J., Duro-Torrijos, J. L., & Nolasco, A. (2013). Acceptability of pandemic A(H1N1) influenza vaccination by Essential Community Workers in 2010 Alicante (Spain), perceived seriousness and sources of information. *Preventive Medicine*, 57(5), 725–728. doi:10.1016/j.ypmed.2013.08.008
2. Chang, H.-J., Huang, N., Lee, C.-H., Hsu, Y.-J., Hsieh, C.-J., & Chou, Y.-J. (2004). The Impact of the SARS Epidemic on the Utilization of Medical Services: SARS and the Fear of SARS. *American Journal of Public Health*, 94(4), 562–564. doi:10.2105/ajph.94.4.562
3. Green, A. West African countries focus on post-Ebola recovery plans. *The Lancet*, 2016. 388(10059), 2463–2465.
4. Jinadu KA, Adebisi AO, Sekoni OO, Bamgboye EA. Integrated disease surveillance and response strategy for epidemic prone diseases at the primary health care (PHC) level in Oyo State, Nigeria: what do health care workers know and feel? *Pan Afr Med J*. 2018 Sep 7;31:19.
5. Quinn SC, Kumar S. Health inequalities and infectious disease epidemics: a challenge for global health security. *Biosecur Bioterror*. 2014 Sep-Oct;12(5):263-73.
6. Simonds, A. K., & Sokol, D. K. (2009). Lives on the line? Ethics and practicalities of duty of care in pandemics and disasters. *European Respiratory Journal*, 34(2), 303–309.
7. Takahashi S, Metcalf CJ, Ferrari MJ, Moss WJ, Truelove SA, Tatem AJ, Grenfell BT, Lessler J. Reduced vaccination and the risk of measles and other childhood infections post-Ebola. *Science*. 2015 Mar 13;347(6227):1240-2.

## Appendix 5 – Inventory of relevant guidelines on COVID-19/pandemic control and response for health workers

| No. | Document Title                                                                                                                                                                                               | Issuing authority/<br>Country of<br>origin/Context | Notes                                                                                                                                                                                                                          |
|-----|--------------------------------------------------------------------------------------------------------------------------------------------------------------------------------------------------------------|----------------------------------------------------|--------------------------------------------------------------------------------------------------------------------------------------------------------------------------------------------------------------------------------|
| 1.  | <a href="#">Responding to community spread of COVID-19</a>                                                                                                                                                   | WHO, Global                                        | Provides comprehensive guidance on response to community spread of COVID-19. Includes links and references to resources for various other aspects of COVID response                                                            |
| 2.  | <a href="#">Interim Guidance for Public Health Personnel Evaluating Persons Under Investigation (PUIs) and Asymptomatic Close Contacts of Confirmed Cases at Their Home or Non-Home Residential Settings</a> | CDC, USA                                           | Provides guidance on infection prevention and control practices when risk assessment and public health management of persons with potential COVID-19 is performed at a home or non-home residential settings                   |
| 3.  | <a href="#">Guidance for Healthcare Worker Self-Monitoring and Work Restriction: In the Presence of Sustained Community Transmission of Coronavirus Disease 2019</a>                                         | Michigan Department of Health & Human Services, US | Guidance for health workers on how to self-monitor themselves during community spread of a pandemic                                                                                                                            |
| 4.  | <a href="#">Mental Health and Psychosocial Considerations During COVID-19 Outbreak</a>                                                                                                                       | WHO, Global                                        | Focusses on mental health of healthcare workers while responding to COVID distress                                                                                                                                             |
| 5.  | <a href="#">Pandemic Influenza Preparedness and Response Guidelines for Healthcare Workers and Healthcare Employers</a>                                                                                      | Occupational Safety and Health Administration, USA | Pages 15-16: Infection control precautions for healthcare workers, guide on work practices and use of personal protective equipment                                                                                            |
| 6.  | <a href="#">2019 Novel Corona Virus Disease Outbreak: What Healthcare Workers Should Know</a>                                                                                                                | Africa CDC, Africa (African Union)                 | Provides details on precautions a health care worker should take to protect themselves which is generic in nature and may be used as an instruction guide for CHWs                                                             |
| 7.  | <a href="#">Risk assessment and management of exposure of health care workers in the context of COVID-19</a>                                                                                                 | WHO, Global                                        | Aids in risk assessment for HCWs after exposure and provides recommendations for their management. Provides recommendations for health workers at low risk for COVID-19 (Page-6) which might be useful in the context of CHWs. |

|     |                                                                                                                                                 |                                 |                                                                                                                                                                                                                                                                                                                  |
|-----|-------------------------------------------------------------------------------------------------------------------------------------------------|---------------------------------|------------------------------------------------------------------------------------------------------------------------------------------------------------------------------------------------------------------------------------------------------------------------------------------------------------------|
| 8.  | <a href="#">Public health management of persons, including health care workers having had contact with COVID-19 cases in the European Union</a> | European CDC, Europe            | This document provides guidance for EU/EEA public health authorities on the management of persons, including healthcare workers, who had contact with COVID-19 cases. May be applicable for community health workers (low risk exposure: page 2).                                                                |
| 9.  | Protect Your Patients and Staff from COVID-19: CDC's Recommended Infection Control Procedures <sup>1</sup>                                      | CDC, USA                        | Recommendation on infection control and protecting patients and staffs. The staff comprises of health workers, but the additional recommendations could be contextual to the CHWs as well.                                                                                                                       |
| 10. | <a href="#">Implementation of Mitigation Strategies for Communities with Local COVID-19 Transmission</a>                                        | CDC, USA                        | Pages 8-9: Mitigation strategies and activities according to level of community transmission or impact of COVID-19 by setting                                                                                                                                                                                    |
| 11. | <a href="#">Australian Health Management Plan for Pandemic Influenza</a>                                                                        | Department of Health, Australia | PPE for health workers, public health officials and other workers which includes CHWs in direct contact with infected (symptomatic) individuals. Protecting healthcare workers by pre-exposure prophylaxis.                                                                                                      |
| 12. | <a href="#">Interim Summary Guidelines for Clinical Management of Patients with COVID 19</a>                                                    | MRI, Sri Lanka                  | Instructions for HCWs                                                                                                                                                                                                                                                                                            |
| 13. | <a href="#">Community case management during an influenza outbreak: A training package for community health workers</a>                         | WHO, Global                     | Role of the CHW during an influenza outbreak, and conducting community education activities and delivering appropriate messages specific to prevention and control of an influenza outbreak                                                                                                                      |
| 14. | <a href="#">COVID-19: protecting health-care workers</a>                                                                                        | The Lancet                      | Adequate provision of PPE is just the first step; other practical measures must be considered, including cancelling non-essential events to prioritise resources; provision of food, rest, family support; and psychological support. Presently, health-care workers are every country's most valuable resource. |
| 15. | <a href="#">Protecting Health Care Workers during the COVID-19 Coronavirus Outbreak – Lessons from Taiwan's SARS response</a>                   | Oxford University Press         | Recommends implementing Traffic Control Bundling (TCB) – a tool that proved effective in dramatically reducing infection rates among HCWs in Taiwan during the SARS outbreak.                                                                                                                                    |

<sup>1</sup> The resource has either been deleted or moved subsequently. However, the pdf of the same is available with RES authors



|     |                                                                                                                                                |                         |                                                                                                                                                                                                                                                                                                                                                               |
|-----|------------------------------------------------------------------------------------------------------------------------------------------------|-------------------------|---------------------------------------------------------------------------------------------------------------------------------------------------------------------------------------------------------------------------------------------------------------------------------------------------------------------------------------------------------------|
|     |                                                                                                                                                |                         | The essence of TCB involves: Triage outside of hospitals (in tents or other shelters) – ensuring patients are triaged in outdoor screening stations to ensure ill patients are directed to a contamination zone, and; Zones of Risk – clearly delineating separate zones, including a contamination, transition, and clean zone each separated by checkpoints |
| 16. | <a href="#">Occupational risks for COVID-19 infection</a>                                                                                      | Oxford University Press | All health personnel should be alert to the risk of COVID-19 in a wide variety of occupations, and not only HCWs. These occupational groups can be protected by good infection control practices. These at-risk groups should also be given adequate social and mental health support.                                                                        |
| 17. | <a href="#">Healthcare Personnel Preparedness Checklist for COVID-19</a>                                                                       | CDC                     | Front-line healthcare personnel in the United States should be prepared to evaluate patients for coronavirus disease 2019 (COVID-19). The document provides a checklist highlighting key steps for healthcare personnel in preparation for transport and arrival of patients with confirmed or possible COVID-19.                                             |
| 18. | <a href="#">What healthcare personnel should know about caring for patients with confirmed or possible coronavirus disease 2019 (COVID-19)</a> | CDC                     | Healthcare personnel caring for patients with confirmed or possible COVID-19 should adhere to CDC recommendations for infection prevention and control (IPC)                                                                                                                                                                                                  |
| 19. | <a href="#">Healthcare Professionals: Frequently Asked Questions and Answers</a>                                                               | CDC                     | CDC currently recommends a cautious approach to persons under investigation (PUI) for COVID-19. Healthcare personnel evaluating PUI or providing care for patients with confirmed COVID-19 should use, Standard Transmission-based Precautions.                                                                                                               |
| 20. | <a href="#">CDC Statement for Healthcare Personnel on Hand Hygiene during the Response to the International Emergence of COVID-19</a>          | CDC                     | CDC recommends the use of alcohol-based hand sanitizers with greater than 60% ethanol or 70% isopropanol as the preferred form of hand hygiene in healthcare settings, based upon greater access to hand sanitizer.                                                                                                                                           |
| 21. | <a href="#">Emergency Responders: Tips for taking care of yourself</a>                                                                         | CDC                     | People with pre-existing mental health conditions should continue with their treatment plans during an emergency and monitor for any new symptoms.                                                                                                                                                                                                            |

|     |                                                                                                                                                                                |                                                            |                                                                                                                                                                                                                                                                                                                                                                                                                                                                                              |
|-----|--------------------------------------------------------------------------------------------------------------------------------------------------------------------------------|------------------------------------------------------------|----------------------------------------------------------------------------------------------------------------------------------------------------------------------------------------------------------------------------------------------------------------------------------------------------------------------------------------------------------------------------------------------------------------------------------------------------------------------------------------------|
| 22. | <a href="#">MOH Pandemic Readiness and Response Plan for Influenza and other Acute Respiratory Diseases</a>                                                                    | Ministry of Health, Singapore                              | Front-line HCWs working at the restructured hospitals, polyclinics and participating primary care clinics may be given antiviral prophylaxis to protect them during the peak of the epidemic.                                                                                                                                                                                                                                                                                                |
| 23. | <a href="#">Healthcare Workers Handbook on Influenza</a>                                                                                                                       | National Institute for Communicable Diseases, South Africa | Page-17: IPC precautions when caring for patients with suspected, probable, or confirmed infection with influenza viruses, or ILI include precautions while working in direct contact with patients, Standard and Droplet should be applied.                                                                                                                                                                                                                                                 |
| 24. | <a href="#">Guidance for Healthcare Worker Self-Monitoring and Work Restriction in the Presence of Sustained Community Transmission of Coronavirus Disease 2019 (COVID-19)</a> | New York City Department of Health and Hygiene, USA        | Page 1-2: All healthcare workers should self-monitor for illness consistent with COVID-19 because all healthcare workers are at risk for unrecognized exposures. A healthcare worker who has had a known high-risk exposure to a patient(s) with confirmed COVID-19, should take extra care to monitor his/her health but can keep working. There is no requirement for 14-day quarantine of healthcare workers with high-risk exposures in the setting of sustained community transmission. |

CDC – Centres for Disease Control and Prevention, WHO – World Health Organization, MRI – Medical Research Institute, HCW- Healthcare Worker, CHW- Community Health Worker, PPE- Personal Protective Equipment, EU- European Union, EEA- European Economic Area, IPC- Infection Prevention & Control

## Appendix 6 – Inventory of self-isolation guidelines in relation to COVID-19 control

| No. | Document title                                                                                                                     | Issuing authority/Country of origin            | Notes                                                                                     |
|-----|------------------------------------------------------------------------------------------------------------------------------------|------------------------------------------------|-------------------------------------------------------------------------------------------|
| 1.  | <a href="#">Information for people who are self-isolating due to contact with a case of COVID-19 or travel to an affected area</a> | BC Centre for Disease Control, Canada          | Clear instructions on self-isolation especially for inbound travellers                    |
| 2.  | <a href="#">Home isolation guidance when unwell (suspected or confirmed cases)</a>                                                 | Department of Health, Australia                | Very basic guidelines on who should be isolated ONLY in case of suspected/confirmed cases |
| 3.  | <a href="#">COVID-19 – Self-isolation for Close Contacts</a>                                                                       | Ministry of Health, New Zealand                | Self-isolation/precaution guidelines for inbound travellers                               |
| 4.  | <a href="#">Know the Difference : Self-monitoring, self-isolation, and isolation for COVID-19</a>                                  | Government of Canada, Canada                   | Basic difference and instruction when to self-monitor/self-isolate/get isolated           |
| 5.  | <a href="#">Patient information sheet for self-isolation at home</a>                                                               | Health Protection Surveillance Centre, Ireland | This is detailed with clear instructions for self-isolated suspected/confirmed cases      |
| 6.  | <a href="#">Healthcare Worker COVID-19 Close Contact Information Leaflet</a>                                                       | Health Protection Surveillance Centre, Ireland | Quarantine order for possible COVID-19 cases because of contact                           |
| 7.  | <a href="#">Guidelines for home quarantine</a>                                                                                     | MoHFW,GoI, India                               | Clear instructions for suspected quarantined people                                       |
| 8.  | <a href="#">Interim Guidelines for Home Quarantine</a>                                                                             | Department of Health, Philippines              |                                                                                           |
| 9.  | <a href="#">National Action Plan for corona virus disease (COVID-19), Pakistan</a>                                                 | Ministry of National Health Services, Pakistan | Annexures are useful. Guidelines on self-quarantine/mitigation from a neighbour.          |
| 10. | <a href="#">Guideline for the Home quarantine / Quarantine in non-health care settings</a>                                         | Epidemiological Unit- MoH, Sri Lanka           |                                                                                           |

MOHFW- Ministry of Health & Family Welfare, GOI- Government of India, MoH- Ministry of Health

Appendix 7 – Inventory of IEC materials in relation to COVID-19 control and response produced by different organisations/authorities worldwide

| No.                                                                       | Title                                                                                                            | Issuing authority/<br>Country of origin                    | Notes                                                                      |
|---------------------------------------------------------------------------|------------------------------------------------------------------------------------------------------------------|------------------------------------------------------------|----------------------------------------------------------------------------|
| <b>COVID-19 details-Symptoms and transmissions</b>                        |                                                                                                                  |                                                            |                                                                            |
| 1.                                                                        | <a href="#">Coronavirus Disease 2019 (COVID-19) Outbreaks in Residential Care Facilities</a>                     | Department of Health, Australia                            | Page 7-8 has good information on what is COVID and its transmission modes. |
| 2.                                                                        | <a href="#">COVID 19 FAQs</a>                                                                                    | Department of Health, Philippines                          |                                                                            |
| <b>Which people are at higher risk of getting infected?</b>               |                                                                                                                  |                                                            |                                                                            |
| 3.                                                                        | <a href="#">Are You at Higher Risk for Severe Illness?</a>                                                       | CDC, USA                                                   | Advisory for high risk groups: aged, pregnant, asthma, HIV, etc.           |
| 4.                                                                        | <a href="#">Coronavirus disease 2019 (COVID-19) Situation Report – 51</a>                                        | WHO, Global                                                | Page 2: risk communication guidance for high risk group                    |
| 5.                                                                        | <a href="#">COVID-19 PUBLIC HEALTH GUIDANCE Self-Isolation for Older Adults and Those Who Have Elevated Risk</a> | California Department of Public Health, USA                | Very detailed guidance for high-risk groups                                |
| <b>Myth VS reality on COVID 19</b>                                        |                                                                                                                  |                                                            |                                                                            |
| 6.                                                                        | <a href="#">Coronavirus disease (COVID-19) advice for the public: Myth busters</a>                               | WHO, Global                                                | WHO's myth vs reality fact-check                                           |
| 7.                                                                        | <a href="#">SHARE FACTS ABOUT COVID-19</a>                                                                       | CDC, USA                                                   | Few facts on COVID                                                         |
| 8.                                                                        | <a href="#">10 WhatsApp forwards you should not forward</a>                                                      |                                                            | Misleading social media communications                                     |
| <b>Key Messages to spread in the community for prevention of COVID 19</b> |                                                                                                                  |                                                            |                                                                            |
| 9.                                                                        | <a href="#">Steps to help prevent the spread of COVID-19 if you are sick</a>                                     | CDC, USA                                                   | Guidelines for suspected COVID                                             |
| 10.                                                                       | <a href="#">Guidelines on Prevention of Coronavirus Disease 2019 (COVID-19) for the General Public</a>           | Centre for Health Protection, DoH, Hong Kong               | Comprehensive guidelines: general public/inbound travellers                |
| 11.                                                                       | <a href="#">COVID-19 CORONAVIRUS FREQUENTLY ASKED QUESTIONS</a>                                                  | National Institute for Communicable Diseases, South Africa | Pages 2-3: protection measures for general public/inbound travellers       |

|                                                                                                  |                                                                                                                                                           |                                                    |                                                                       |
|--------------------------------------------------------------------------------------------------|-----------------------------------------------------------------------------------------------------------------------------------------------------------|----------------------------------------------------|-----------------------------------------------------------------------|
| 12.                                                                                              | <a href="#">Interim Guidelines for 2019-nCoV response in residential communities</a>                                                                      | Department of Health, Philippines                  | From a developing country                                             |
| 13.                                                                                              | <a href="#">Novel Coronavirus (2019-nCoV)-General Advisory for Public</a>                                                                                 | Dept. of Health & Family Welfare, Delhi Government | General advisory for public (very generic)                            |
| <b>For those showing symptoms or have travelled to other countries or states in past 2 weeks</b> |                                                                                                                                                           |                                                    |                                                                       |
| 14.                                                                                              | <a href="#">Travelers from Countries with Widespread Sustained (Ongoing) Transmission Arriving in the United States</a>                                   | CDC, USA                                           | Very broad brief guidelines for inbound travellers                    |
| 15.                                                                                              | <a href="#">Instructions for Self-Isolation for Iowans Returning from Countries Affected by COVID-19</a>                                                  | IOWA Department of Public Health, USA              | Self-isolation guidelines for inbound travellers from COVID countries |
| 16.                                                                                              | <a href="#">Advices for Sri Lankan Students/Nationals and other foreign nationals returning from high risk area of on-going Corona virus transmission</a> | Epidemiological Unit MoH, Sri Lanka                |                                                                       |
| 17.                                                                                              | <b>10 and 11 is relevant too</b>                                                                                                                          |                                                    |                                                                       |
| <b>How to take care of yourself (FLHWs) and carry on with your other duties?</b>                 |                                                                                                                                                           |                                                    |                                                                       |
| 18.                                                                                              | <b>On Appendix 5</b>                                                                                                                                      |                                                    |                                                                       |

DoH- Department of Health
